# Supplementary material for: A variably imprinted epiallele impacts seed development
Source: PubMed Central journal article supplement (PMC6237401; doi:10.1371/journal.pgen.1007469), 2018-11-05
Supplement: pgen.1007469.s001.pdf [file pgen.1007469.s001.pdf]

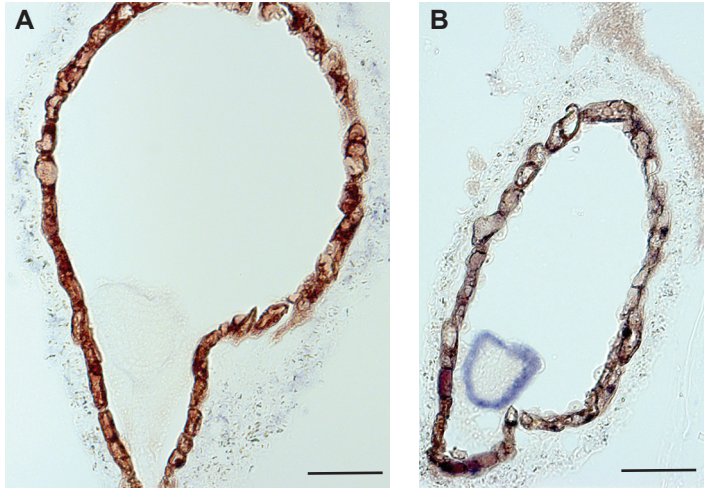

**S1 Fig. Negative and positive controls for *in situ* hybridization.** (A) *HDG3* sense probe hybridization for Col x Col seed. (B) *PDF1* antisense probe hybridization for *hdg3-1* x *hdg3-1* seed. Scale bars, 50  $\mu$ m.
