# Supplementary material for: A variably imprinted epiallele impacts seed development
Source: PLOS journal article supplement (doi:10.1371/journal.pgen.1007469), 2018-11-05
Supplement: S3 (10.1371/journal.pgen.1007469.s003) [file journal.pgen.1007469.s003]

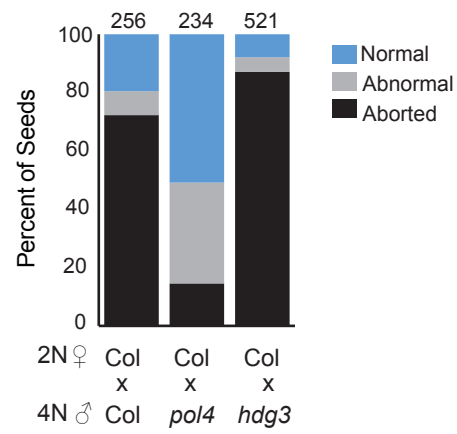

**S3 Fig. Tetraploid *hdg3-1* does not rescue interploidy seed lethality caused by paternal genomic excess.** Tetraploid plants were created by colchine treatment and confirmed by flow cytometry analysis of DNA content. Tetraploid *pol iv* mutants are a positive control for interploidy seed rescue. Number of seeds analyzed on top of bars.
